# Supplementary material
Source: bioRxiv or medRxiv preprint supplement (https://medrxiv.org/content/medrxiv/early/2023/10/12/2023.09.07.23295190/DC7/embed/media-7.pdf)

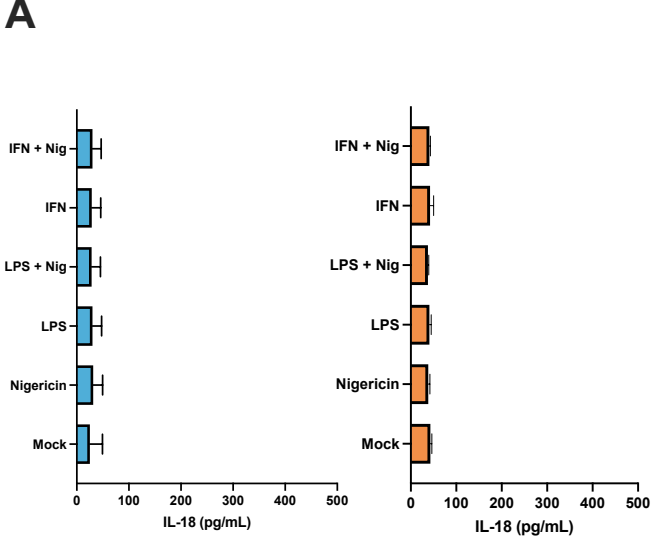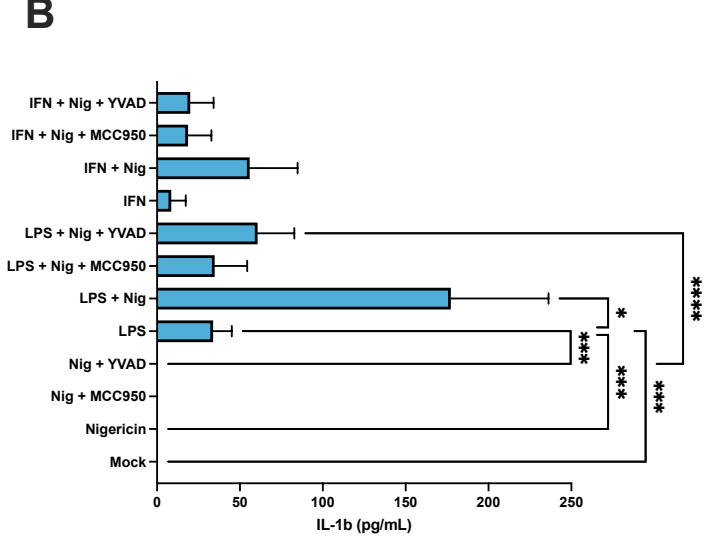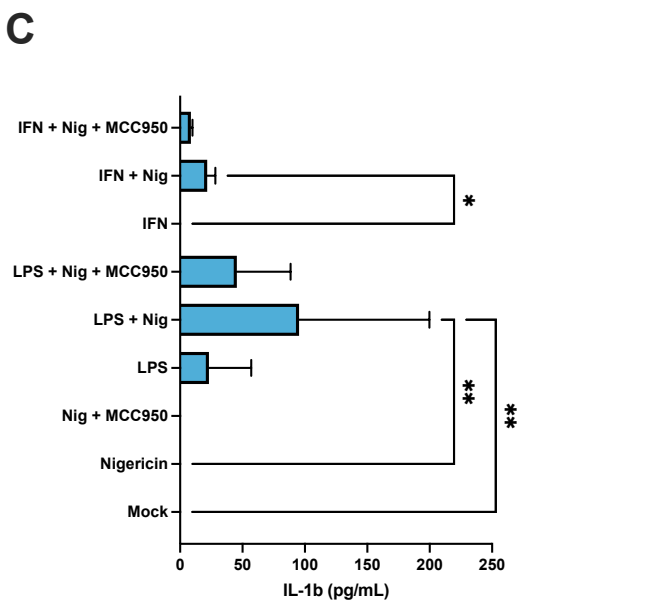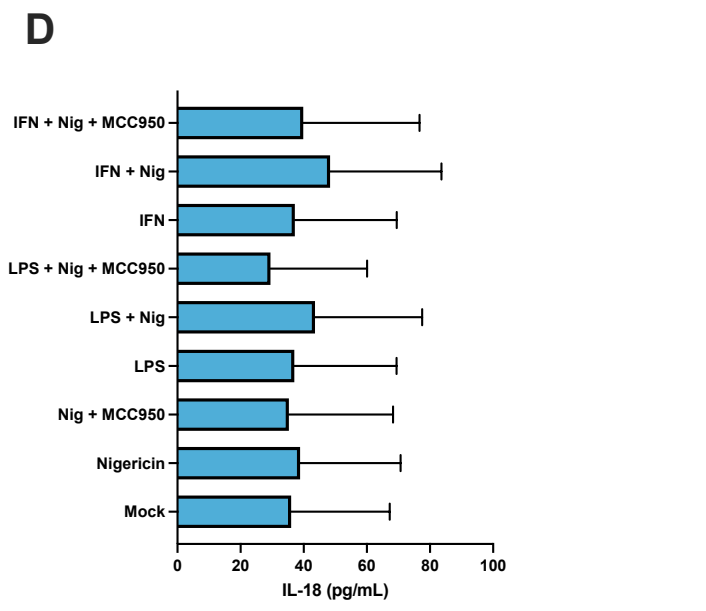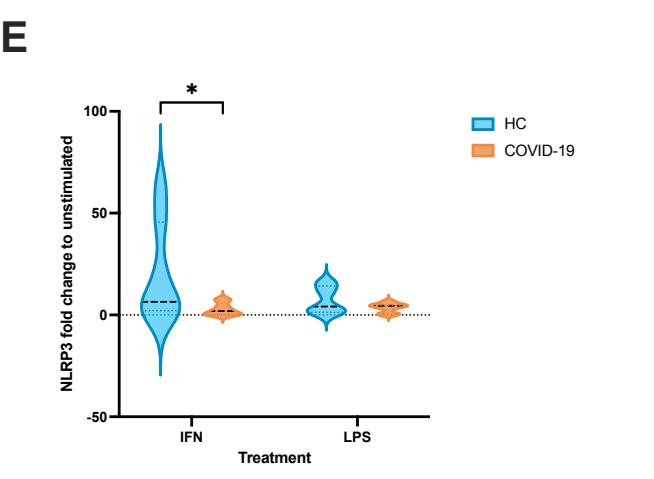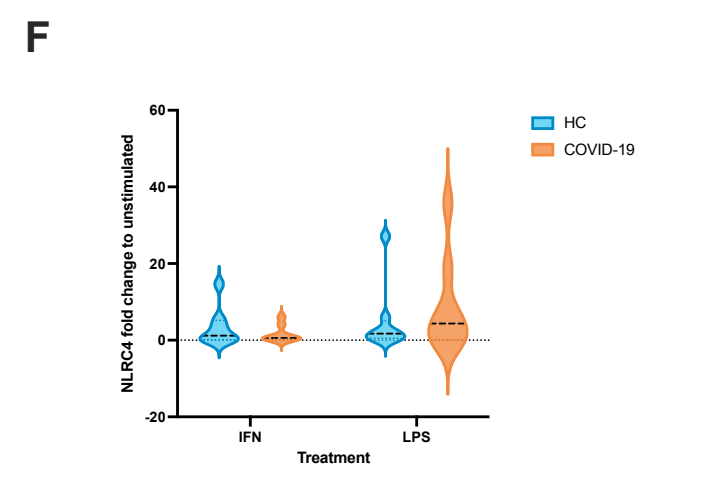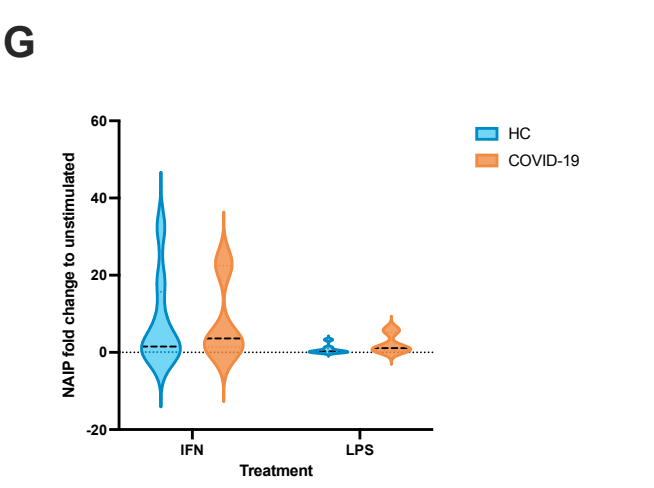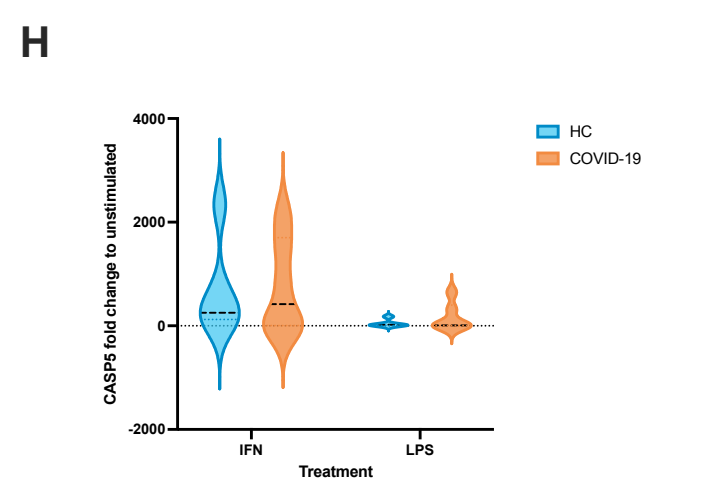

Supplement: Supplementary file [file media-7.pdf]
